# Supplementary material
Source: bioRxiv or medRxiv preprint supplement (https://www.biorxiv.org/highwire/filestream/127286/field_highwire_adjunct_files/0/422741-1.pdf)
Supplement: Supplementary file [file 422741-1.pdf]

# Transgenerational developmental effects of immune priming in the red flour beetle *Tribolium castaneum*

Nora KE Schulz<sup>1</sup>, M Pauline Sell<sup>1</sup>, Kevin Ferro<sup>1</sup>, Nico Kleinhöling<sup>1</sup>, Joachim Kurtz<sup>1\*</sup>

<sup>1</sup>Institute for Evolution and Biodiversity, University of Münster, Münster, Germany

\* Correspondence:

Joachim Kurtz

[Joachim.kurtz@uni-muenster.de](mailto:Joachim.kurtz@uni-muenster.de)

## Supplementary information

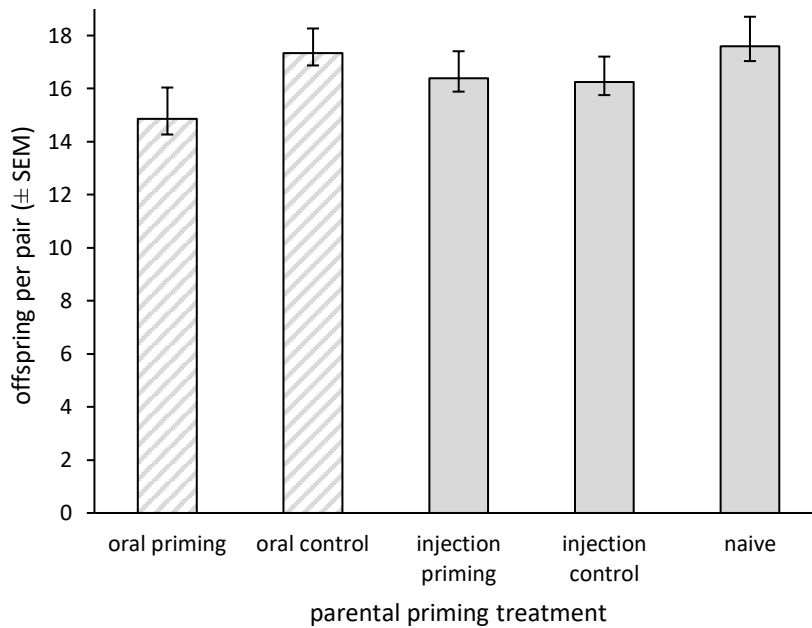

**Figure S1 Fecundity after oral and injection priming of larvae.** Total live offspring from two consecutive 24 h ovipositions (n=57-66 mating pairs)

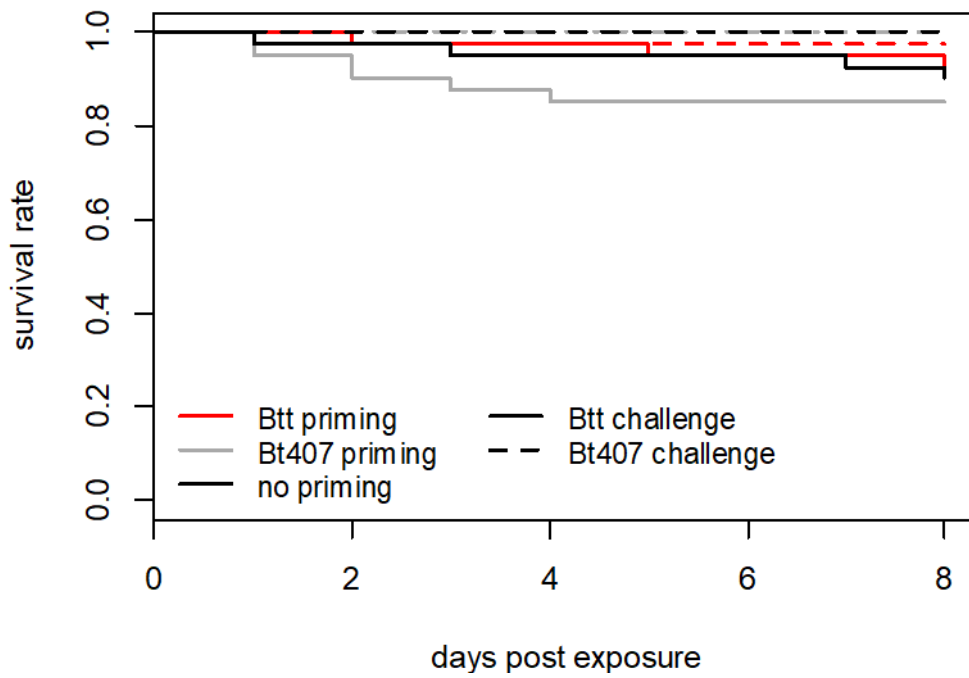

**Figure S2 Survival after oral challenge** after priming within generation (n=40)

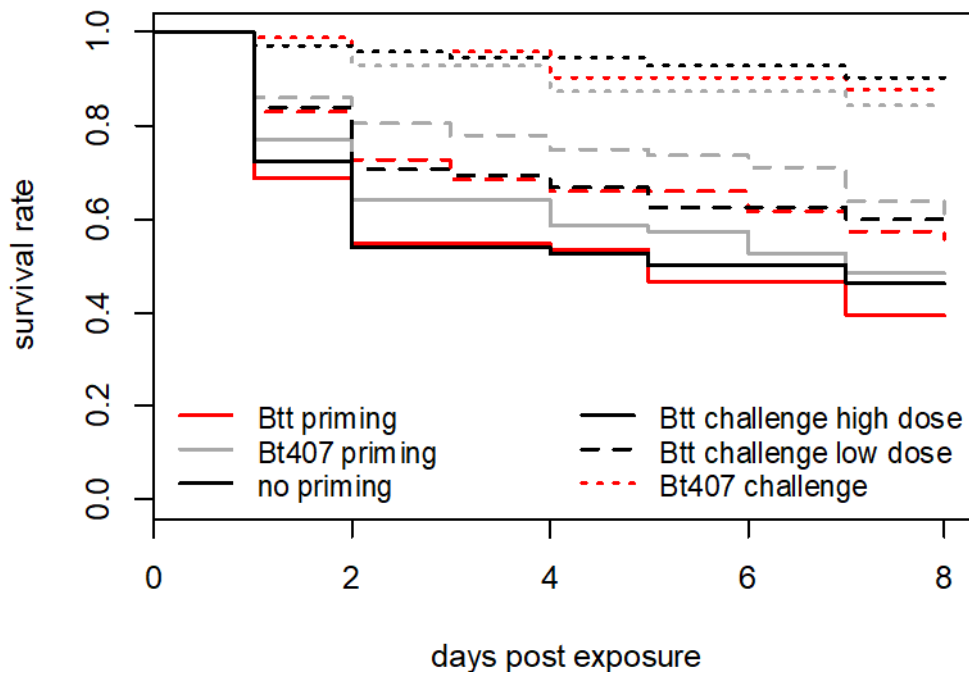

**Figure S3 Survival after oral challenge of the offspring generation** after parental oral priming (n=71-76). Two concentrations of *Btt* spores were used (low= $5 \times 10^9$ , high= $1 \times 10^{10}$ )

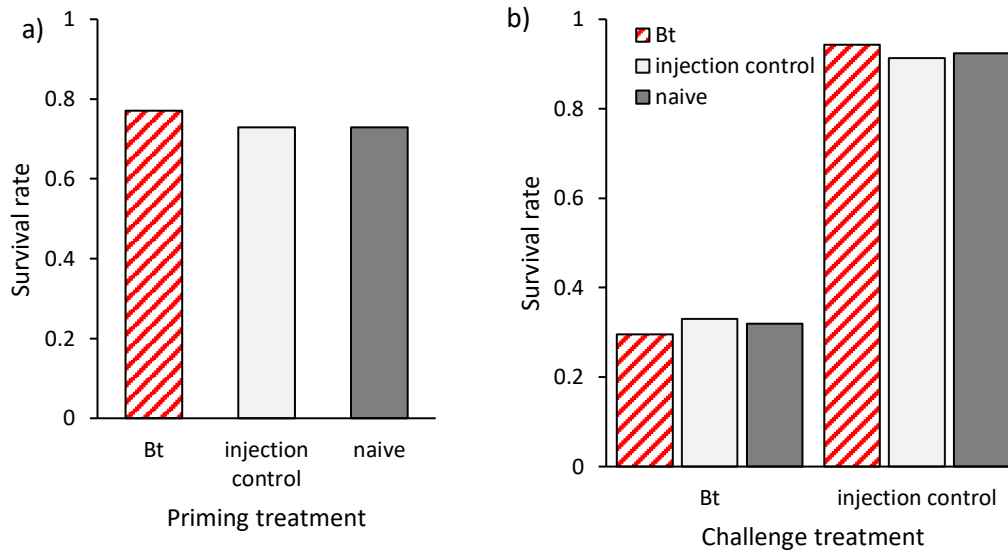

**Figure S4 Survival after injection challenge** a) Larvae from the parental generation were injected with live *Bt* (n=48) b) Larvae of the offspring generation after parental injection priming were either injected with live *Bt* or PBS as a control (n=96).
